# Supplementary material for: Anti-oxidative stress response genes: bioinformatic analysis of their expression and relevance in multiple cancers
Source: PubMed Central journal article supplement (PMC3926850; doi:10.18632/oncotarget.1658), 2013-12-15
Supplement: oncotarget-04-2577-s001.pdf [file oncotarget-04-2577-s001.pdf]

## Anti-oxidative stress response genes: bioinformatic analysis of their expression and relevance in multiple cancers - Rotblat et al

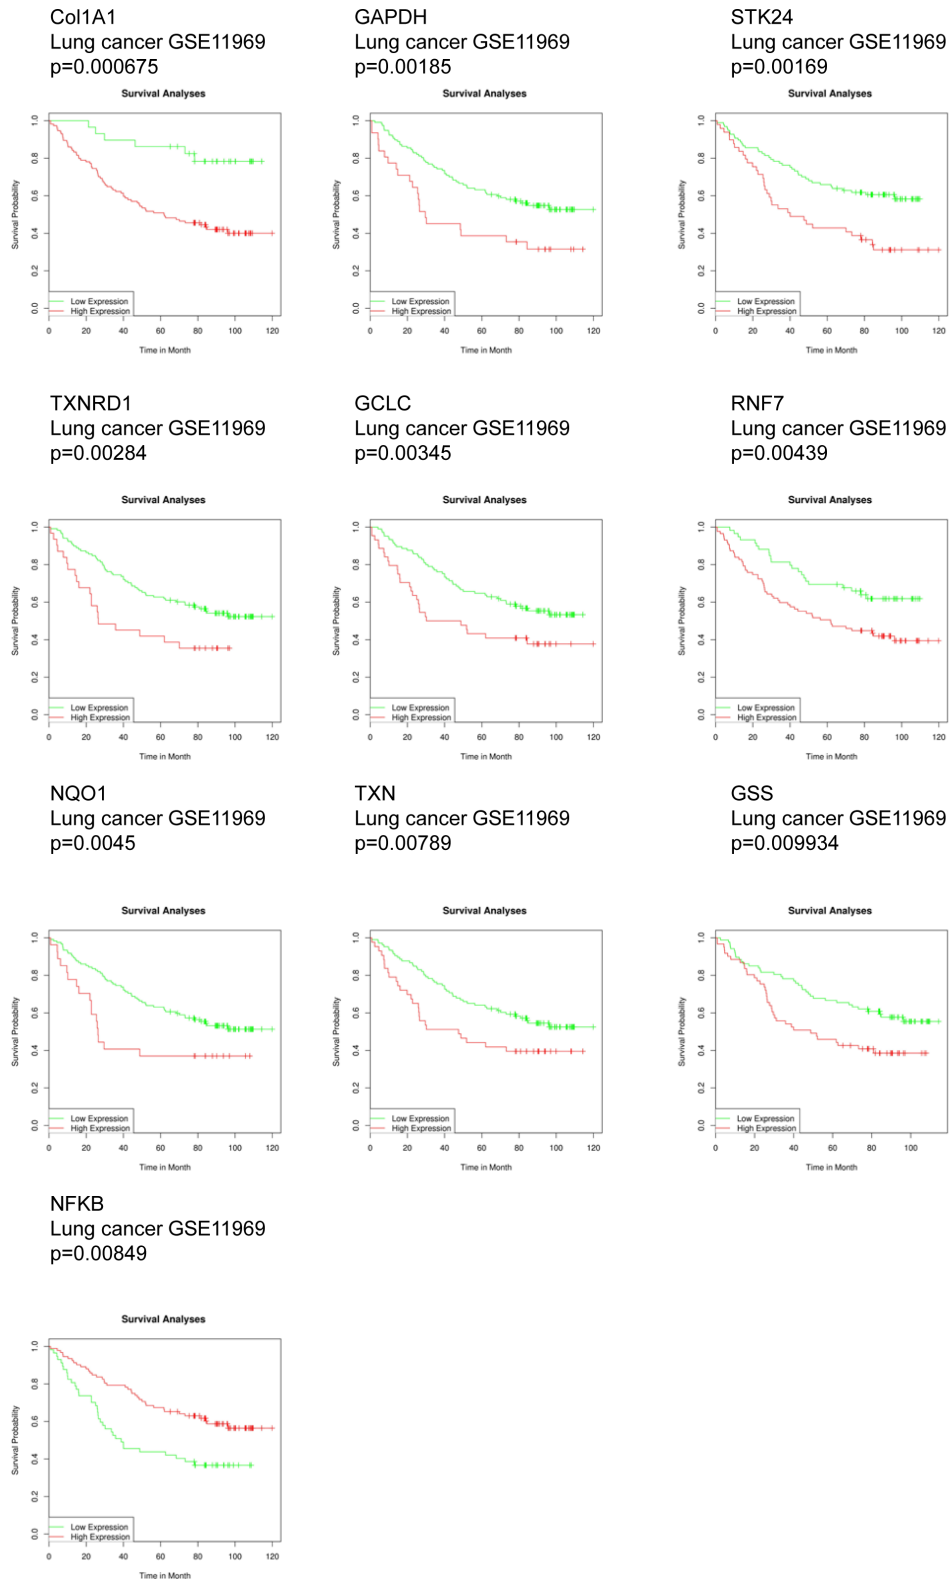

**Figure S1: Kaplan-Meier plots for all oxidative stress response genes found to be highly expressed in cancers whose expression significantly correlates with survival in lung cancer.**

FOXM1  
Breast cancer GSE22220  
 $p < 10^{-7}$

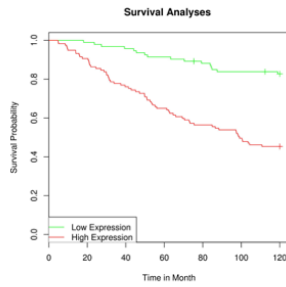

TXNRD1  
Breast cancer GSE22220  
 $p < 10^{-5}$

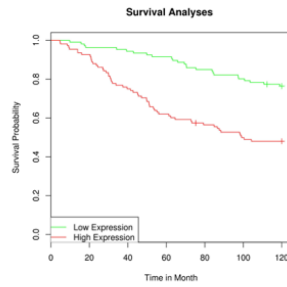

CDC2  
Breast cancer GSE22220  
 $p < 10^{-4}$

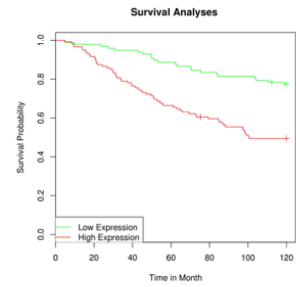

CASP3  
Breast cancer GSE22220  
 $p < 10^{-4}$

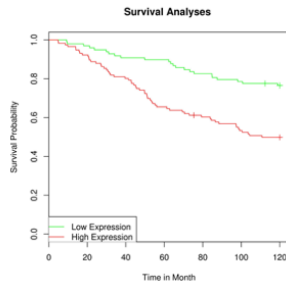

ECT2  
Breast cancer GSE22220  
 $p = 0.00012$

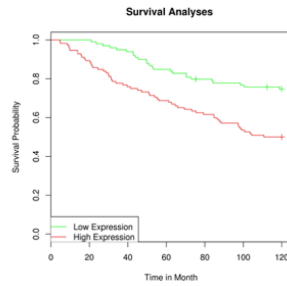

HMOX1  
Breast cancer GSE22220  
 $p = 0.00012$

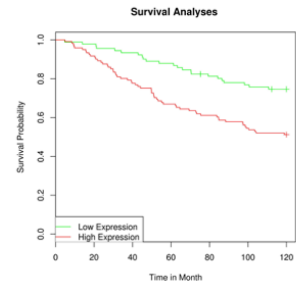

NUDT1  
Breast cancer GSE22220  
 $p = 0.0016$

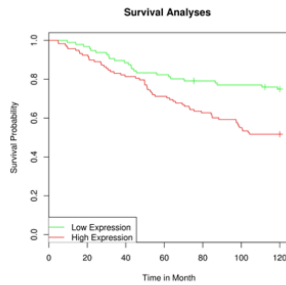

SERPINE1  
Breast cancer GSE22220  
 $p = 0.00167$

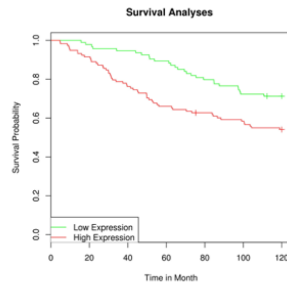

PRDX4  
Breast cancer GSE22220  
 $p = 0.00276$

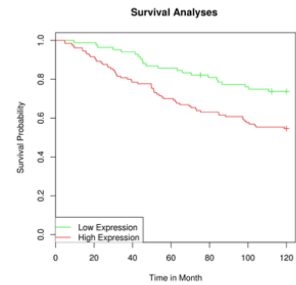

Figure S2-S3: Kaplan-Meier plots for all oxidative stress response genes found to be highly expressed in cancers whose expression significantly correlates with survival in breast cancer.

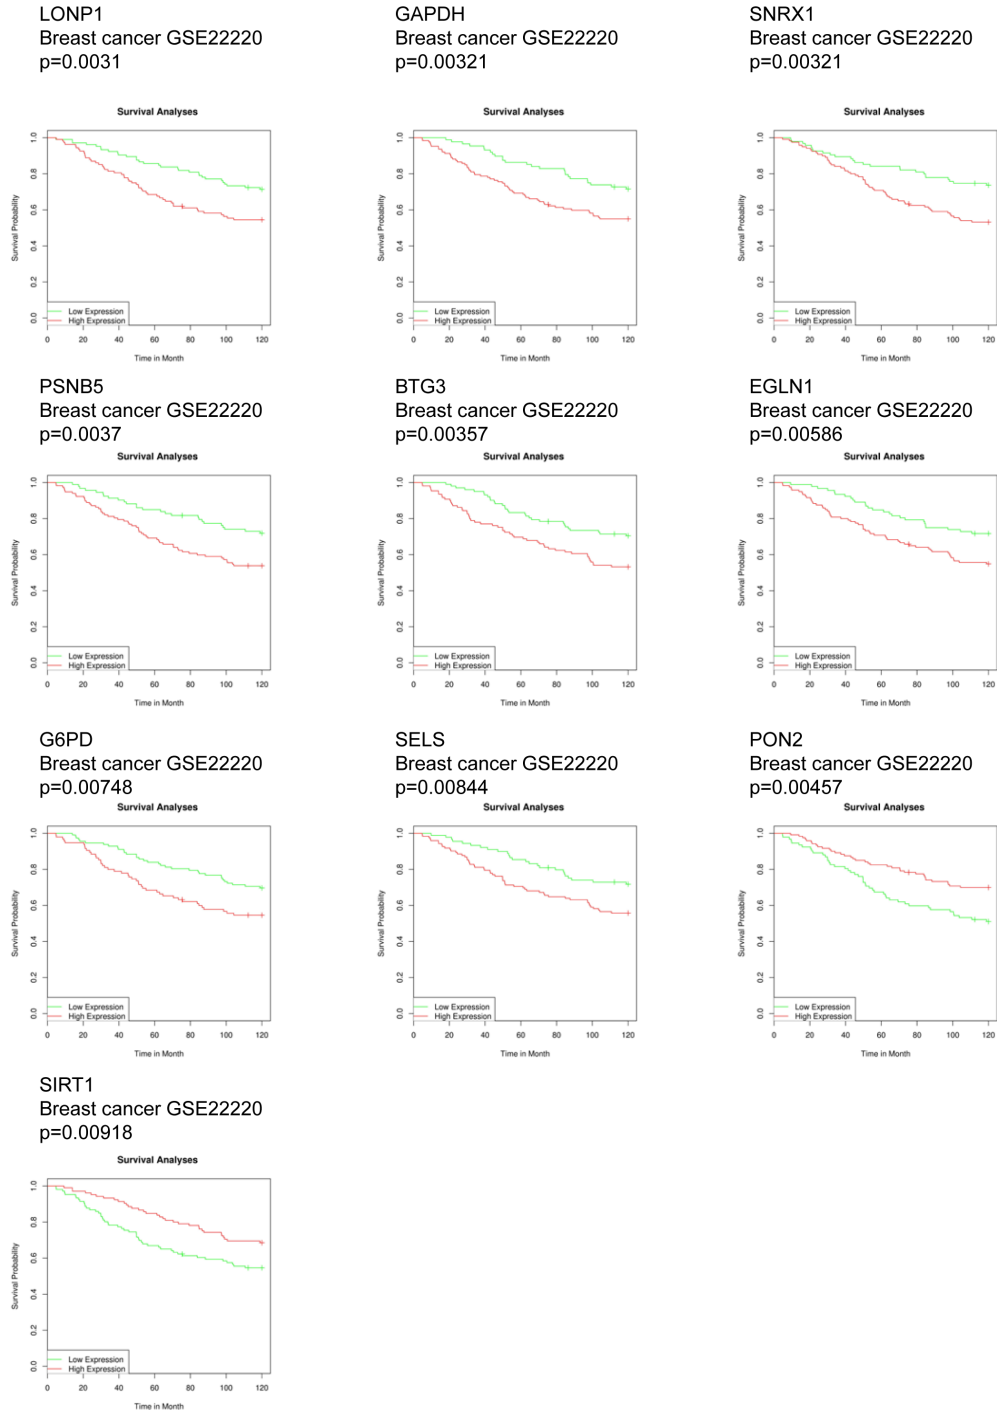

Figure S2-S3: Kaplan-Meier plots for all oxidative stress response genes found to be highly expressed in cancers whose expression significantly correlates with survival in breast cancer.
